# Supplementary material
Source: PubMed Central journal article supplement (PMC3342862)

**Table S1. Sequences of the oligos and primers used**

| <b>Oligo</b>                                                              | <b>Sequence</b>                   |
|---------------------------------------------------------------------------|-----------------------------------|
| <u>Morpholinos</u>                                                        |                                   |
| Random Sequence MO                                                        | CCT CTT ACC TCA GTT ACA ATT TAT A |
| <i>metAP2</i> MO                                                          | CAT GTC TTT ACC CAT CTT GCA CAG G |
| <i>metAP2-like</i> MO                                                     | CCT CAC CAT CTG TAA TGA AGT TTA C |
| <u>Primers for RT-PCR for MetAP2 mRNA in splice-site morpholino study</u> |                                   |
| MetAP2 rtF                                                                | ACG CTG ATT TTA CCG AAT GG        |
| MetAP2 rtR                                                                | TGC GTT GGG AGT GTA GTG AG        |
| <u>Primers for the cloning of MetAPs in mRNA and riboprobe synthesis</u>  |                                   |
| MetAP1 F                                                                  | TCT GAC CGA CAG CAG CAG AAG       |
| MetAP1 R                                                                  | TGA CTG GCT GAT CGG TGA TAT GG    |
| MetAP2 F                                                                  | ACA TAA TGG CAG ACG TGC AG        |
| MetAP2 R                                                                  | CCA CCT ACT GGC GTA ACG AT        |
| MetAP2-like F                                                             | ACG CTG ATT TTA CCG AAT GG        |
| MetAP2-like R                                                             | TGC GTT GGG AGT GTA GTG AG        |
| <u>Primers for semi-quantitative RT-PCR</u>                               |                                   |
| ZF $\beta$ -actin F                                                       | TTC CTT CCT GGG TAT GGA ATC       |
| ZF $\beta$ -actin R                                                       | GCA CTG TGT TGG CAT ACA GG        |
| MetAP1 F                                                                  | AGG AGG GGG ACA TAT TGA AC        |
| MetAP1 R                                                                  | GTC TGA ACCAAT CTC TTG GC         |
| MetAP2 F                                                                  | TGG CCA CTC TAT TGG ACA GT        |
| MetAP2 R                                                                  | CTC GAT GGC ATA AAC CTC TC        |
| MetAP2-like F                                                             | CCA TCT GTG ATC TGT ACC CC        |
| MetAP2-like R                                                             | TCT CCT CAT CGC TCA TTC TC        |
| <u>Primers For Q-RT-PCR</u>                                               |                                   |
| ZF $\beta$ -actin F                                                       | TTC CTT CCT GGG TAT GGA ATC       |
| ZF $\beta$ -actin R                                                       | GCA CTG TGT TGG CAT ACA GG        |
| ZF scl F                                                                  | CTA TTA ACC GTG GTT TTG CTG G     |
| ZF scl R                                                                  | CCA TCG TTG ATT TCA ACC TCA T     |
| ZF lmo2 F                                                                 | GGA CGC AGG CTT TAC TAC AAA C     |
| ZF lmo2 R                                                                 | CCG GAT CCT CTT TTC ACA GGA A     |
| ZF gata1 F                                                                | AAG ATG GGA CAG GCC ACT AC        |
| ZF gata1 R                                                                | TGC TGA CAA TCA GCC TCT TTT       |

---

| <b>Oligo</b>       | <b>Sequence</b>               |
|--------------------|-------------------------------|
| ZF eh $\alpha$ 1 F | TGC TCT CTC CAG GAT GTT GA    |
| ZF eh $\alpha$ 1 R | TCA CAG TCT TGC CGT GTT TC    |
| ZF eh $\beta$ 1 F  | AGG CTC TGG CAA GGT GTC TCA   |
| ZF eh $\beta$ 1 R  | CAT TGG GTT TCC CAG GAT       |
| ZF pu.1 F          | GGG CAG TTT TAA CCA AAG ATC A |
| ZF pu.1 R          | CCC AAG AGT GAT CGT TCT GAC   |
| ZF l-plastin F     | GAA GCT CTG ATC GCT CTG CT    |
| ZF l-plastin R     | GCT TCT TTT CAT CCG TCA GG    |
| ZF mpo F           | GGG GCA GAA GAA GAA AGT CC    |
| ZF mpo R           | CCC TTG CTA AAC TCT CAT CTC G |
| ZF c-myb F         | TTT CTA CCG AAT CGA ACA GAT G |
| ZF c-myb R         | CAA TCA CCC GTT GGT CTT CT    |
| HU MetAP2 F        | GTC TGT GTG ATG TTG GTG A     |
| HU MetAP2 R        | AAT CGG CAC TGT TTT TCC       |

---

**Table S2. Fold-change of expression of *mpo* (18 hpf) and *c-myb* (48 hpf) in metap2-like<sup>MO</sup>**

| <b>Gene</b>  | <b>Control</b> | <b>metap2-like<sup>MO</sup></b> | <b>p-value</b> |
|--------------|----------------|---------------------------------|----------------|
| <i>mpo</i>   | 1.00           | 1.23 ± 0.17                     | 0.19           |
| <i>c-myb</i> | 1.00           | 1.09 ± 0.12                     | 0.56           |

The data as shown represented average results of 3 experiments.

### **Figure S1. Amino acid alignment of MetAPs in different species**

Sequences shaded in black or grey designate identical and similar residues respectively. Residues involved in the coordination of metal ions and in contact with fumagillin are labeled by closed and open arrowheads respectively. Underlined regions represent the insert region unique to the MetAP2 family. Putative zinc finger residues in human MetAP1 are marked by asterisks. Hs: *Homo sapiens*; Mm: *Mus musculus*; Dr: *Danio rerio*.

### **Figure S2. Bootstrapped phylogenetic tree generated with the neighbor-joining algorithm with 500 replicates**

Values at each inner node represent bootstrap values, which is the percentage of replicates able to reconstruct the selected node. Hs: *Homo sapiens*; Mm: *Mus musculus*; Xl: *Xenopus laevis*; Dm: *Drosophila melanogaster*; Tn: *Tetraodon nigroviridis*.

### **Figure S3. Semi-quantitative PCR showing the expression of *metap2* at different developmental stages normalized with the expression level of $\beta$ -actin**

#### **Figure S4**

(A) DNA sequencing confirmed the molecular targeting of *metap2* MO. Bracket: Exon4 of *metap2* which is not present in defectively spliced *metap2* mRNA in *metap2*MO; Red circle: amino acid 106 where frame shift occur in *metap2*<sup>MO</sup>; Green circle: amino acid 154 where premature stop occur in *metap2*<sup>MO</sup>. (B) Defective splicing of *metap2* mRNA in *metap2*<sup>MO</sup> as shown by RT-PCR at 48, 72, and 96 hpf. Wild-type *metap2* mRNA demonstrated by the 660 b.p. (black arrowhead) band gradually increased and became dominate again at 96 hpf while defectively-spliced *metap2* mRNA demonstrated by the 557 b.p. (red arrowhead) band gradually decreased. (C) Typical deformed embryos (less than 20% of total injected *metap2*<sup>MO</sup>) after injection of *metap2* MO which were excluded from further analysis. Bars represent 250  $\mu$ m

### **Figure S5. Whole-mount ISH comparing expression of *scl*, *gata1*, $\alpha$ -*eHb* (lateral view), *pu.1* (lateral and ventral view), and *l-plastin* (ventral view) at 18 hpf between control and *metap2*<sup>MO</sup>**

Bars represent 250  $\mu$ m

#### **Figure S6**

(A) Whole-mount TUNEL assay comparing apoptosis between control and *metap2*<sup>MO</sup> at 36 and 48 hpf in the trunk area. Bars represent 250  $\mu$ m

### Figure S7

(A) Semi-quantitative PCR showing the expression of *metap1* and *metap2-like* at different developmental stages normalized with the expression level of  $\beta$ -actin. (B) Whole-mount ISH showing the spatial expression of *metap1* and *metap2-like* at different developmental stages. Bars represent 250  $\mu$ m

### Figure S8

(A) Diagrammatic presentation of the action of the *metap2-like* morpholino. Red line represents the binding site of the splice-junction targeted *metap2-like* morpholino (B) DNA sequencing confirmed the molecular targeting of *metap2-like* MO. Purple bracket: Exon-2 of *metap2-like* ; Red bracket: Exon-3 of *metap2-like* which is not present in defectively spliced *metap2-like* mRNA in *metap2*MO; Green bracket: Exon-4 of *metap2-like*.

### Figure S9

(A) Western blot showing the expression level of  $\beta$ -catenin in control, fumagillin treated embryos and *metap2*<sup>MO</sup> at 18 hpf normalized to the expression level of  $\beta$ -actin. (B) Flow cytometry showing the percentage of gfp positive cell unaffected in Tg(*top:gfp*) embryos which is either injected with random sequence MO (control), treated with fumagillin or injected with *metap2* MO. Wt denotes Wild-type.

### Figure S10

(A) Fluorescent microscopy of Tg(*fill:gfp*) at 48 hpf comparing the development of development of dorsal aorta (DA), dorsal vein (DV) and intersegmental vessel (ISV) in the trunk region between control, MEK inhibitor treated embryos and *metap2*<sup>MO</sup> co-treated with MEK inhibitor. (control:  $97.1 \pm 1.2\%$  with normal ISV patterning in total 102 embryos; MEK inhibitor treatment:  $83.8 \pm 2.7\%$  with perturbed ISV patterning in total 105 embryos; *metap2*<sup>MO</sup> with MEK inhibitor treatment:  $88.3 \pm 1.5\%$  with perturbed ISV patterning in total 77 embryos; n=3) (B) Whole-mount ISH comparing expression of *c-myb* at 36 hpf between control, MEK inhibitor treated embryos and *metap2*<sup>MO</sup> co-treated with MEK inhibitor (control:  $93.3 \pm 1.4\%$  with normal *c-myb* expression in total 90 embryos; MEK inhibitor treatment:  $90.6 \pm 2.1\%$  with normal *c-myb* expression in total 85 embryos; *metap2*<sup>MO</sup> with MEK inhibitor treatment:  $80.2 \pm 4.4\%$  with reduced *c-myb* expression in total 86 embryos; n=3). Bars represent 100  $\mu$ m

**Figure S11. Total number of colonies formed in colony-forming assay between control and fumagillin treated CB CD34<sup>+</sup> cells**

After 3 days treatment, 3000 cells (from vehicle) and cell numbers proportional to its expansion (fumagillin treated) were cultured in methylcellulose medium H4434 under the exposure of fumagillin for 14 days and total colonies numbers were counted.

**Figure S12. Lineage analysis of human cells in engrafted mice**

For CD34 and CD33, cells were co-stained with anti-CD45 and anti-CD34 or anti-CD33 antibodies respectively. Lineages were determined by CD45 positive and CD34 or CD33 positive fraction. For CD19, cells were single stained with anti-CD19 antibody. Lineage was determined by percentage of CD19-positive cells divided by CD45-positive cells (Figure 7F). N=3. N.A. indicates “not available” due to human engraftment is too low; N.D. indicates not done because mouse die before reaching harvesting time point.

Figure S1

```

Hs MetAP1      -----MAAVETR-VCETDGCSSSEAKLQCPTCIKLGIQGSYF-----CSQECFKGWSWATHKLLHKKAKDEKAK
Mm metap1     -----MAAVETR-VCETDGCSSSEAKLQCPTCIKLGIQGSYF-----CSQECFKGWSWATHKLLHKKAKDEKAK
Dr metap1     -----MAAVETR-ECETEGCHSEAKLQCPTCIKLGIQGSYF-----CSQECFKGWSWATHKLLHKKAKEDKTN
Hs MetAP1D    -----MAAPSGVH--LLVRR-----GSHRIFS--SPLNHIYLLHKQSS-----
Mm metap1d    -----MAAPIGVP--LLVRC-----GCORILS--SPLNHIYLLHKRSR-----
Dr metap1d    -----MAAPCAAQ-CLYRTGGLR-----LLQRISR--LPCHCKDASLAHQ-----
Hs MetAP2     --MAGVEEVAASGSHLNGDLDPPDREEGAASTAEAAKAKRRKRRKSKGPSAAGEQEPDKESGASVDEVAROLERSALEDKERDEDEDG
Mm metap2     --MAGVQQAASFGHNLNGDLDPPDREEGTSSSTAEAAKAKRRKRRKCKGAVSAVQQELDKESGALVDEKAKQLESQALEEKERDDDDDEDG
Dr metap2     MADVQTQEPQSAVQTLILPNGDLSHLPKEDTEPVDETGKKKKKKKKKCKGAAAVENHDGEGD---TDIAKVTKQLDQOTLEEQEKEDAEED
Dr metap2-like-----MEANGLPVPF---VMDTLIVNCCERE--AEDPAKKKKRKKKKNKSVVVSAGHSEQVD---DGELEEVKKPLLEQONLEEKEREEDGEEED

Hs MetAP1     REVSSWTVEGDINTDPWAGYR----YTGKLRPHYPLMPTREVPVSYIQRDPDYADHP--LCMSESEQALKGTSQIKLLSSSEDIEGMRLVCRLA
Mm metap1     REVCSWTVEGDVNTDPWAGYR----YTGKLRPHYPLMPTREVPVSYIQRDPDYADHP--LCMSESEQALKGTSQIKLLSSSEDIEGMRLVCRLA
Dr metap1     DEEK-NCVEKEVNTDPWPGYR----YTGKLRPHYPLMPTREVPVSYIQRDPDYADHP--LCMSESEQTMKGTSQIKLLNAAEIEGMRVVCKLA
Hs MetAP1D    -----SQQRNFFFRQRD-----ISHSIYVLPAAVSSAHPVPHKIKKKPDYVIT---GIVP-----DWGDSIEVKDEDQIQGLHQACOLA
Mm metap1d    -----SQQRHFFFRQRD-----ISHSVSPAAVSSAHPVPHKIKKKPDYVIT---GIVP-----DWGDSIEVKDEDQIQGLRREACRLA
Dr metap1d    -----CQFHRSFFWRPK-----ITSHSVRPAIVRPAIVPVPKHIQRDPDYVSS---SKVP-----EWPDYIIEIKDEEQIQGLRRACOLA
Hs MetAP2     DGDGDGATGKKKKKK-KKKGKPKVQTDPPSVPICDLYPNGVVFPKQCEYPPYPTQ-DGRTAAWRTTSEKKALDQASEEIWDFREAAEAH
Mm metap2     DGDADGATGKKKKKK-KKKGKPKVQTDPPSVPICDLYPNGVVFPKQCEYPPYPTQ-DGRTAAWRTTSEKKALDQASEEIWDFREAAEAH
Dr metap2     GEEGD-SAGKKKKKK-KKKGKPKVQTDPPSVPICDLYPNGVVFPKQCEYPPYPTQ-DGRTAASRTTSEKKALDQASEEIMWDFRQAAEAH
Dr metap2-likeGEEADNTSGKKKKKKPKKKKGPKVQTDPPSVPICDLYPNGVVFPKQCEYPPYPTQ-DGRSAAWRMSDEEKRVLDEANEEMWSDFRQAAEAH

Hs MetAP1     REVLDDVAAGMIKPCVTTEEIDHAVH---LACTIARNCPSPNLNYNFPKSCCTSVNEVICHGIPDRRPLQEGDIVNVDITLYRNGYHGDLN
Mm metap1     REVLDDIAAGMIKPCVTTEEIDHAVH---LACTIARNCPSPNLNYNFPKSCCTSVNEVICHGIPDRRPLQEGDIVNVDITLYRNGYHGDLN
Dr metap1     REVLDDIAAMMKPCVTTEEIDHAVH---LACTIARNCPSPNLNYNFPKSCCTSVNEVICHGIPDRRHLOEGDILNIDITVYHNGYHGDLN
Hs MetAP1D    RHVLLLAGKSLKVDMTTEEIDALVH---RETIISHNAYPSPLGYGFFPKSVCTSVNIVLCHGIPDSRPLQEGDIINIDVTVYNGYHGDT
Mm metap1d    RHVLLLAGKSLKVDMTTEEIDALVH---WEIIRHDAYPSPLGYGFFPKSVCTSVNIVLCHGIPDSRPLQEGDIINIDVTVYNGYHGDT
Dr metap1d    RHILLTGNLSLKVGMTTDEIDFVH---QEARHNGYPSPLGYGFFPKSVCTSVNIVLCHGIPDSRPLQEGDIINIDVTVYLYEGYHGDT
Hs MetAP2     ROVRKYVMSWIKPGMTMIEICEKLEDCSRKLIKENGLNAGLAFP--TGCSLNNCAAHYTPNAGDPTVLOYDDICKIDFGTHIS---GRII
Mm metap2     ROVRKYVMSWIKPGMTMIEICEKLEDCSRKLIKENGLNAGLAFP--TGCSLNNCAAHYTPNAGDPTVLOYDDICKIDFGTHIS---GRII
Dr metap2     ROVRKYVQSWIKPGMTMIEICEKLEDCSRKLIKENGLNAGLAFP--TGCSLNNCAAHYTPNAGDPTVLOYDDICKIDFGTHIS---GRII
Dr metap2-likeROVRRYVKSWIKPGMTMIDICERLEACSRRLIKEDGLNAGLAFP--TGCSLNNCAAHYTPNAGDPTVLRYYDVCKIDFGTHIS---GRII

Hs MetAP1     ETEFFVGEVDDGARKLVQTTYECLMOAIDAVKPGVRYRELGNILQKHAQ-----ANGFSVRSYCGHGIHKLHFTAPNVPHYAKNKA
Mm metap1     ETEFFVGDVDEGARKLVQTTYECLMOAIDAVKPGVRYRELGNILQKHAQ-----ANGFSVRSYCGHGIHKLHFTAPNVPHYAKNKA
Dr metap1     ETEFFVGEVDEGAKRLVQTTYECLMOAIDSVKPGIRYRELGNITQKHAQ-----ANGFSVRSYCGHGIHKLHFTAPNVPHYAKNKA
Hs MetAP1D    ETEFLVGNVDECGKLVAVARRCRDEATAACRAGAPFSVIGNTISRIITH-----QNGFOVCPHFVGHGIGSYFHHGHPPIWHHANDSD
Mm metap1d    ETEFLVGNVDESGKLVAVARRCRDEATAACRAGAPFSVIGNTISRIITH-----QNGFOVCPHFVGHGIGSYFHHGHPPIWHHANDND
Dr metap1d    ETEFLIGSVNDQGRKLVAVARRCRDQATAACRAGAPFSVIGNTISRIITH-----SNGFRVCPYFIGHGIGSYFHHGHPPIWHHANDND
Hs MetAP2     DCAFTVTENPKYDITLLKAVKDATNTGKICAGIDVRLCDVGEATQEVMSYEVEIDGKTYQVKPIRNLNGHSIGQYRIHAGKTVP IVKGGE
Mm metap2     DCAFTVTENPKYDITLLKAVKDATNTGKICAGIDVRLCDVGEATQEVMSYEVEIDGKTYQVKPIRNLNGHSIGQYRIHAGKTVP IVKGGE
Dr metap2     DCAFTVTENPKYDITLLKAVKDATNTGKICAGIDVRLCDVGEATQEVMSYEVEIDGKTYQVKPIRNLNGHSIGQYRIHAGKTVP IVKGGE
Dr metap2-likeDCAFTVTENPKFDHILEAVADATNTGKICAGIDVRLCDVGEATQEVMSYEVEIDGKTYQVKPIRNLNGHSIGQYRIHAGKTVP IVKGGE

Hs MetAP1     VGVMKSGHVFTEPMTCEGG-----WQDETW
Mm metap1     VGVMKSGHVFTEPMTCEGG-----WQDETW
Dr metap1     VGVMKPGHVFTEPMTCEGG-----WQDETW
Hs MetAP1D    L-PMEEGMAFTIEPMTCEGS-----PEFKVL
Mm metap1d    L-PMEEGMAFTIEPMTCEGS-----PEFKVL
Dr metap1d    L-KMEEGMEFTIEPMTCEG-----SGFRIL
Hs MetAP2     ATRMEEGEVYALETFGSTCKGQVHDDMECSHYMKNFVDVGHVP IRLPRTKHLNINENFGTLAFCRRWLDRLGESKYLMAKNLCLDGLGIV
Mm metap2     ATRMEEGEVYALETFGSTCKGQVHDDMECSHYMKNFVDVGHVP IRLPRTKHLNINENFGTLAFCRRWLDRLGESKYLMAKNLCLDGLGIV
Dr metap2     ATRMEEGEVYALETFGSTCKGMVHDDMECSHYMKNFVDVGHVP IRLPRAKHLNINENFGTLAFCRRWLDRLGETKYLMALKNLCLDGLGII
Dr metap2-likeATRMEEGEVYALETFGSTCKGQVHDDMDCSHYMKNFVDVGHVP IRLPRAKHLNINENFGTLAFCRRWLDRLGESKYLMAKNLCLDGLGII

Hs MetAP1     PDGWTAVTRDGRSAQFEHTLLVTDTCCEILTRRLD-SARPHFMSQF
Mm metap1     PDGWTAVTRDGRSAQFEHTLLVTDTCCEILTRRLD-SSRPHFMSQF
Dr metap1     PDGWTAVTRDGRSAQFEHTLLVTDTCCEILTRRLDEDNGRAHFLSQM
Hs MetAP1D    EDAWTVVSLDNORSAQFEHTVLITSRGAQILTK---LPHEA-----
Mm metap1d    EDAWTVVSLDNORSAQFEHTVLITPRGVEILTK---LPQEA-----
Dr metap1d    SDKWTAVSVDDKRSQFEHTVVITSDGVEILTK---LPEED-----
Hs MetAP2     DPYPPLCDIKGSYTAQFEHTILLRPTCKEVVSRGDDY-----
Mm metap2     DPYPPLCDIKGSYTAQFEHTILLRPTCKEVVSRGDDY-----
Dr metap2     DPYPPLCDTKGYSYTAQFEHTILLRPTCKEVVSRGDDY-----
Dr metap2-likeDPYPPLCDTKGYSYTAQFEHTILLRPTCKEVVSRGDDY-----

```

Figure S2

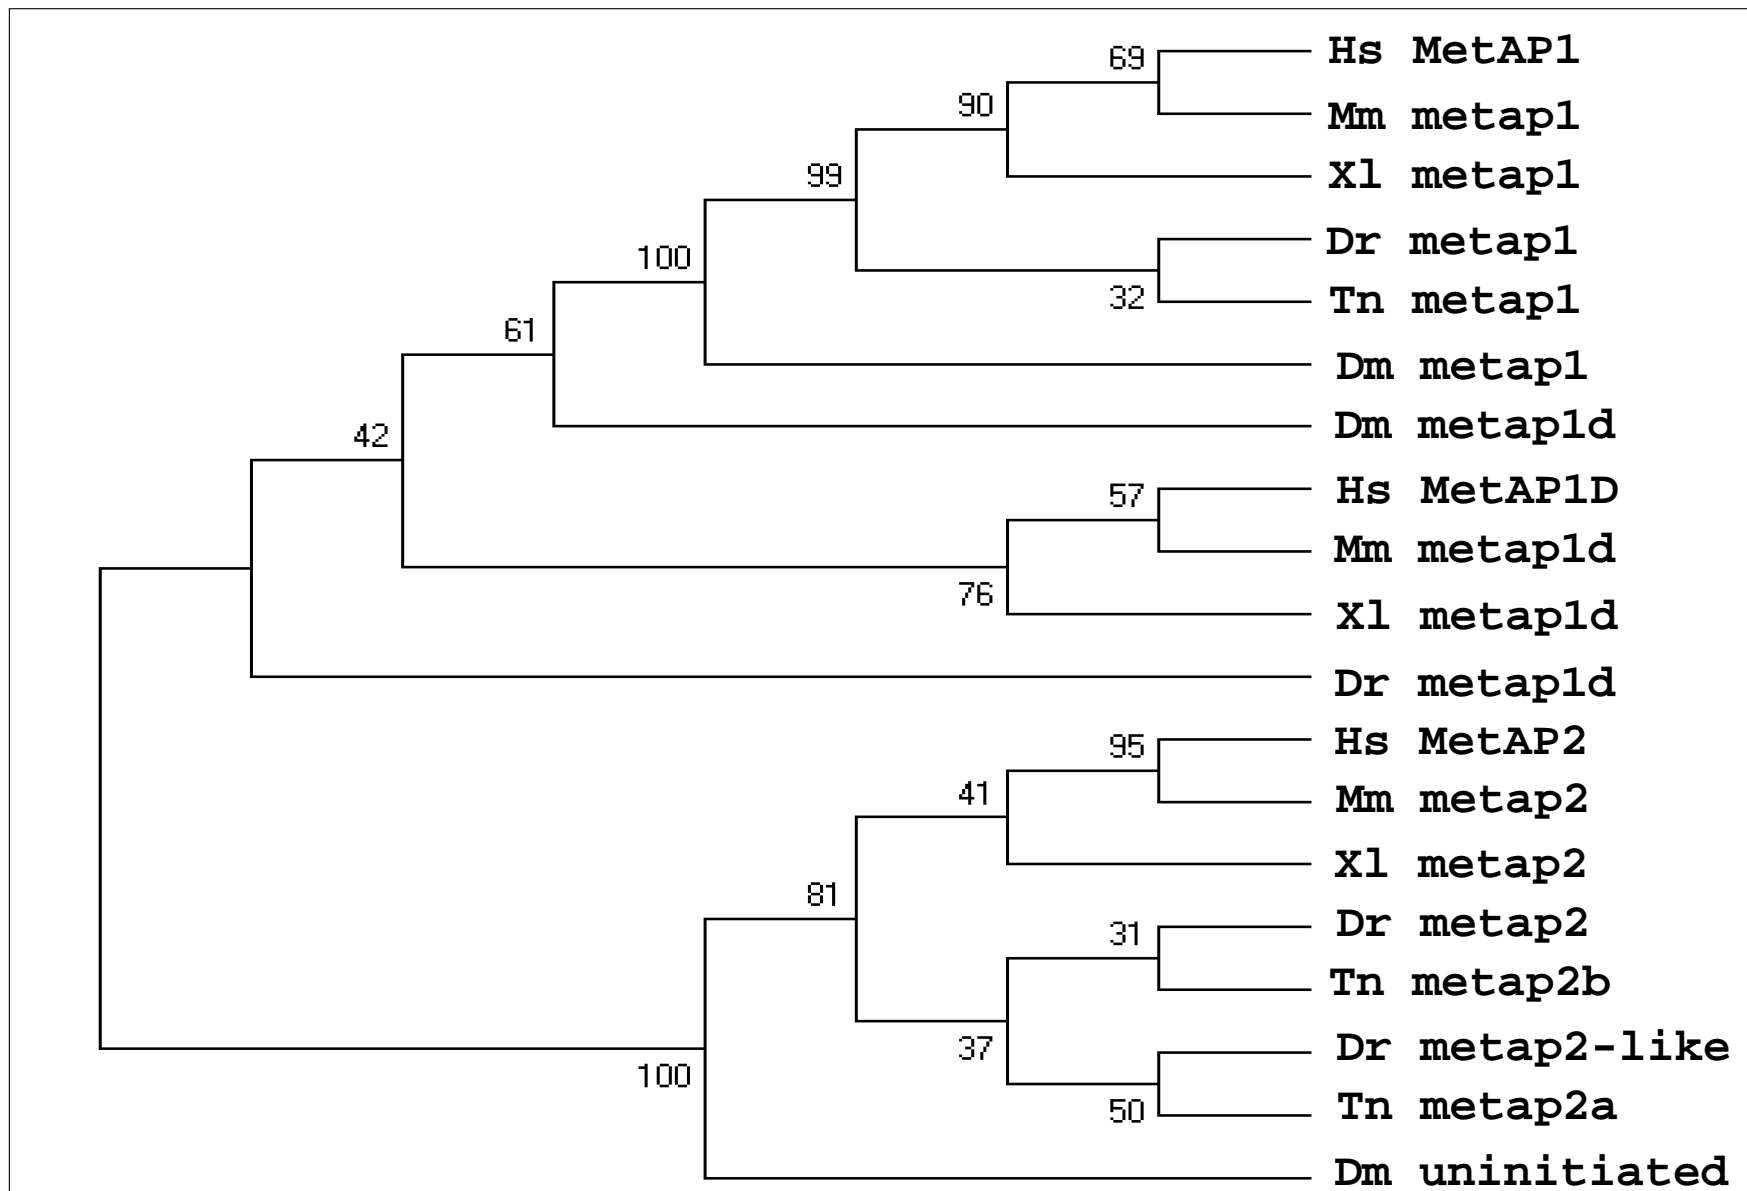



Figure S3

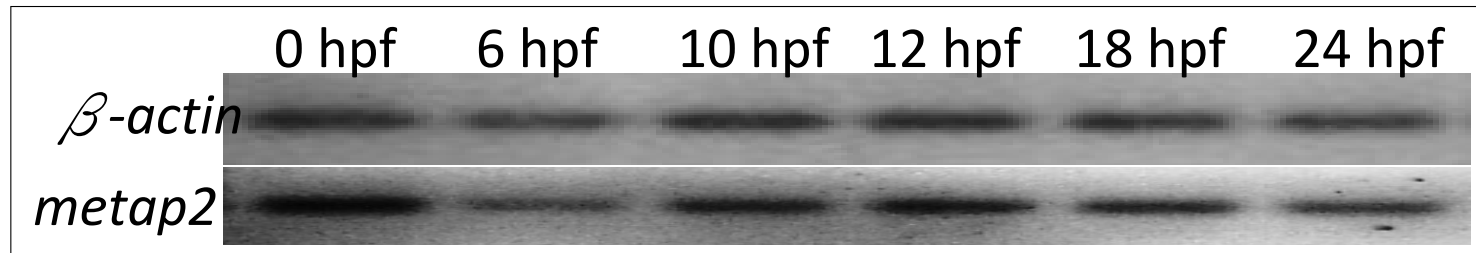

Figure S4

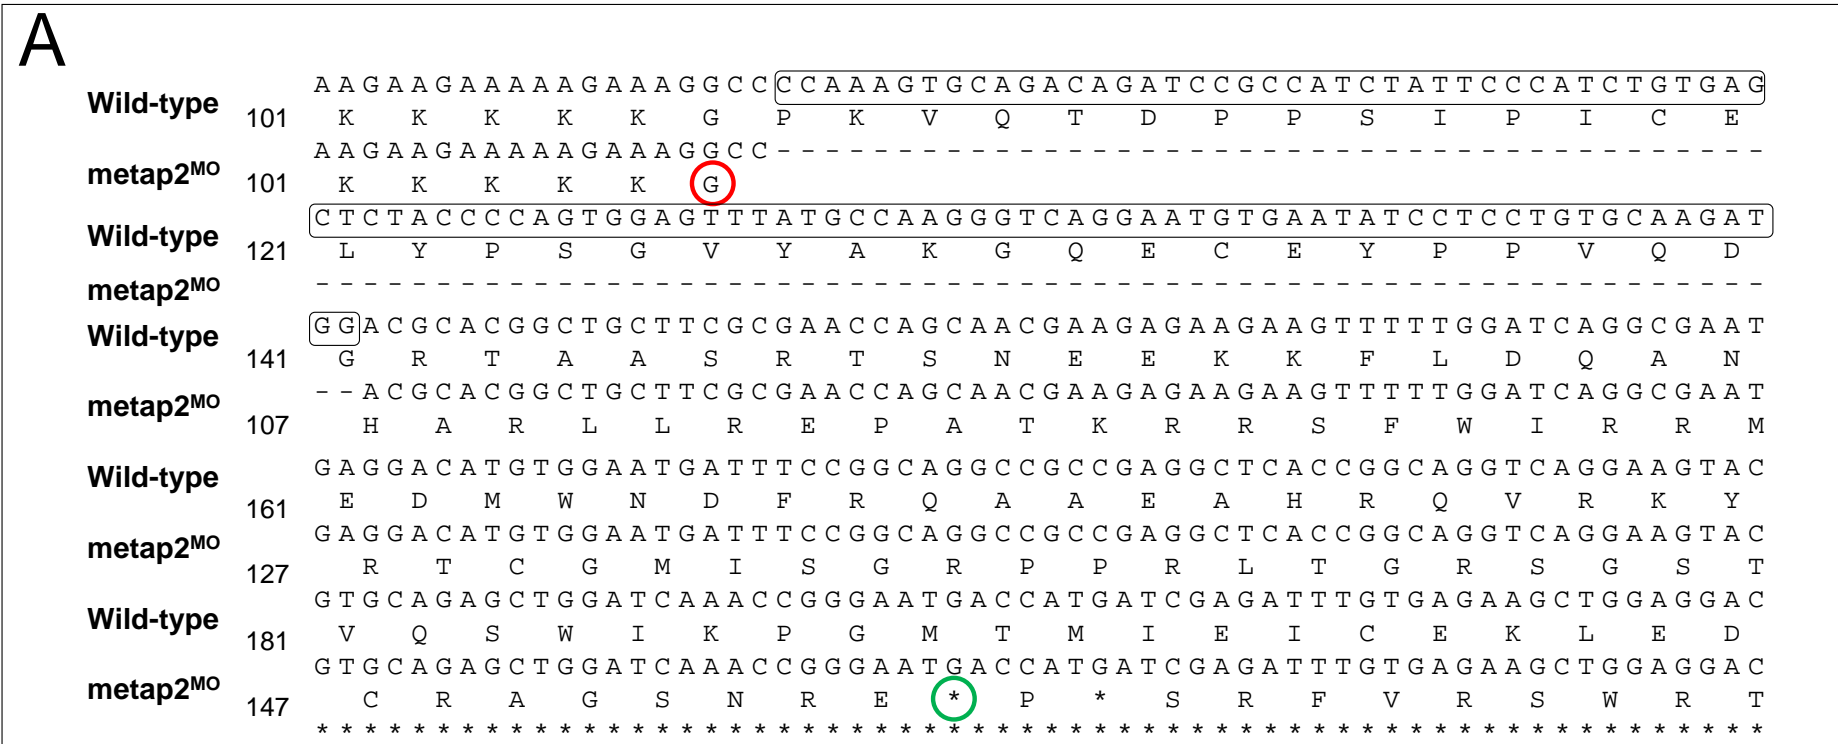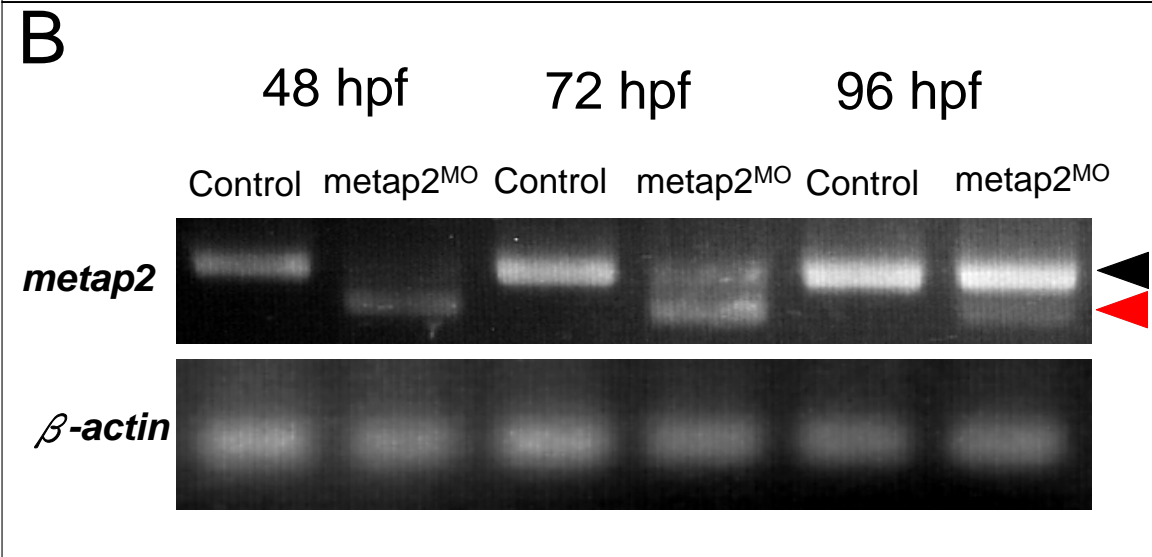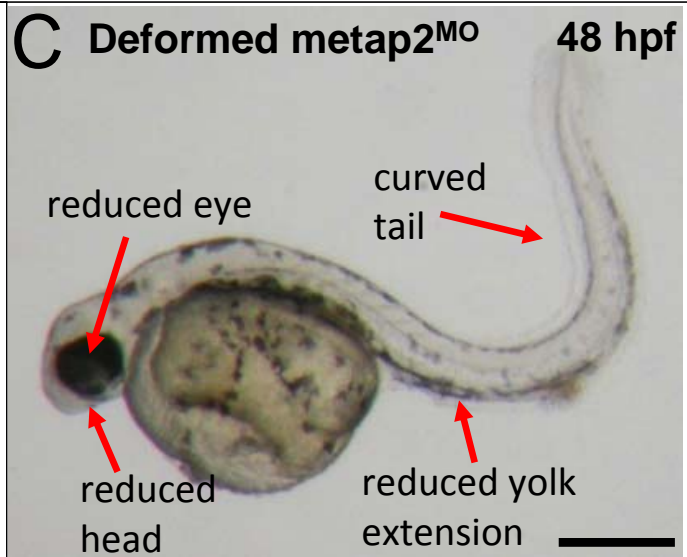

Figure S5

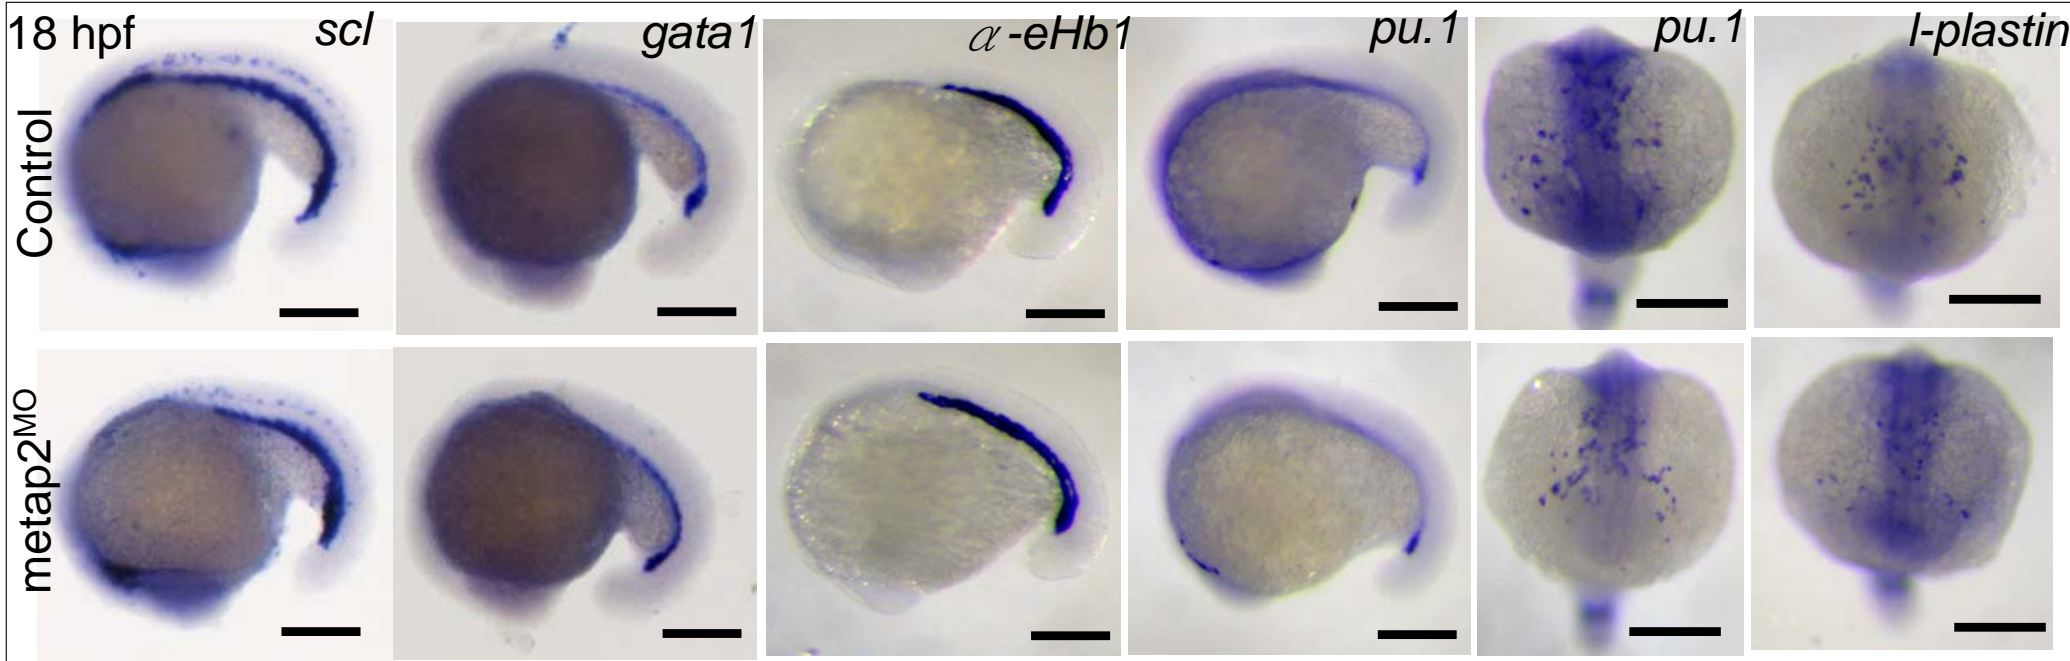

Figure S6

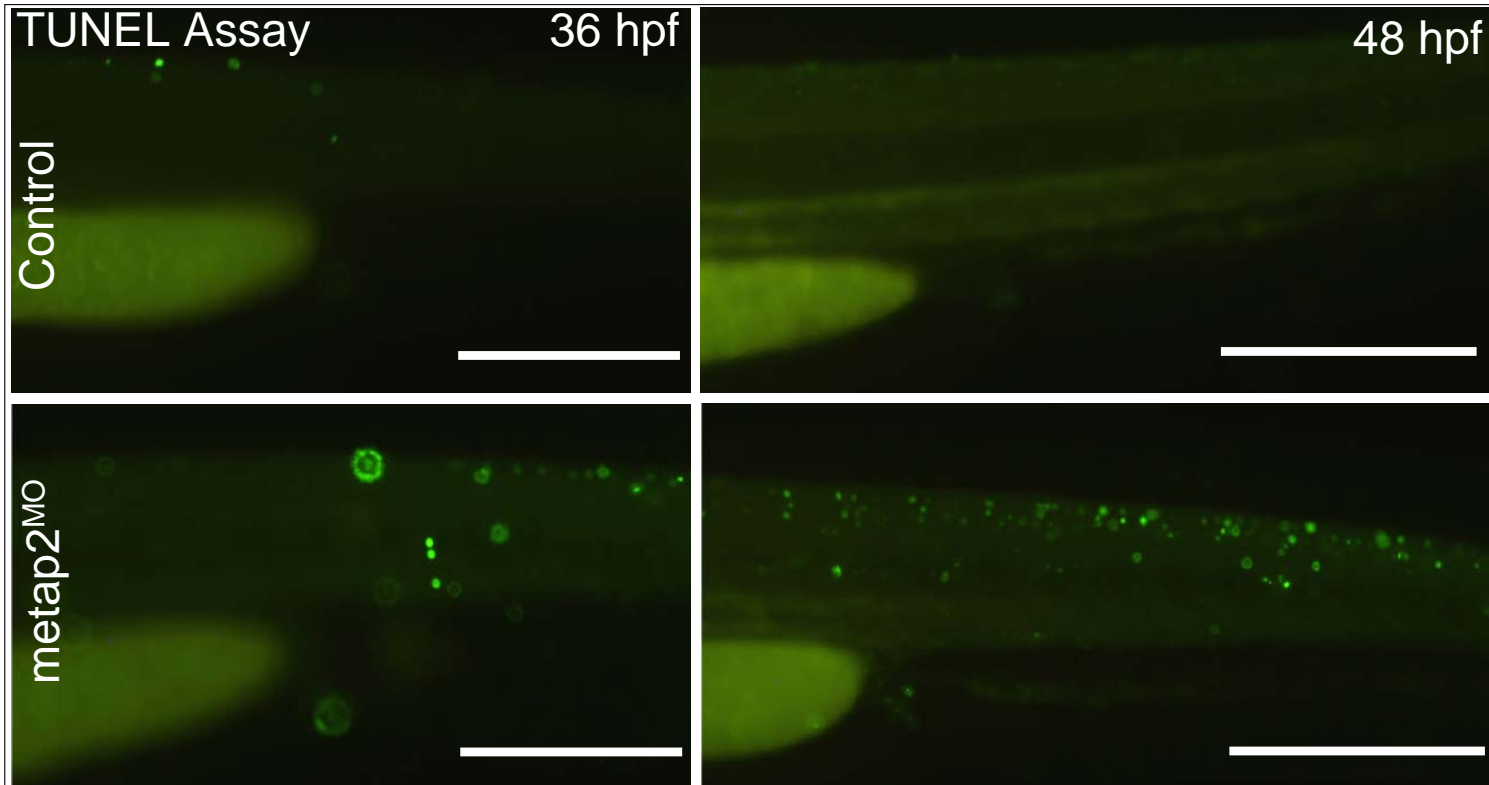

Figure S7

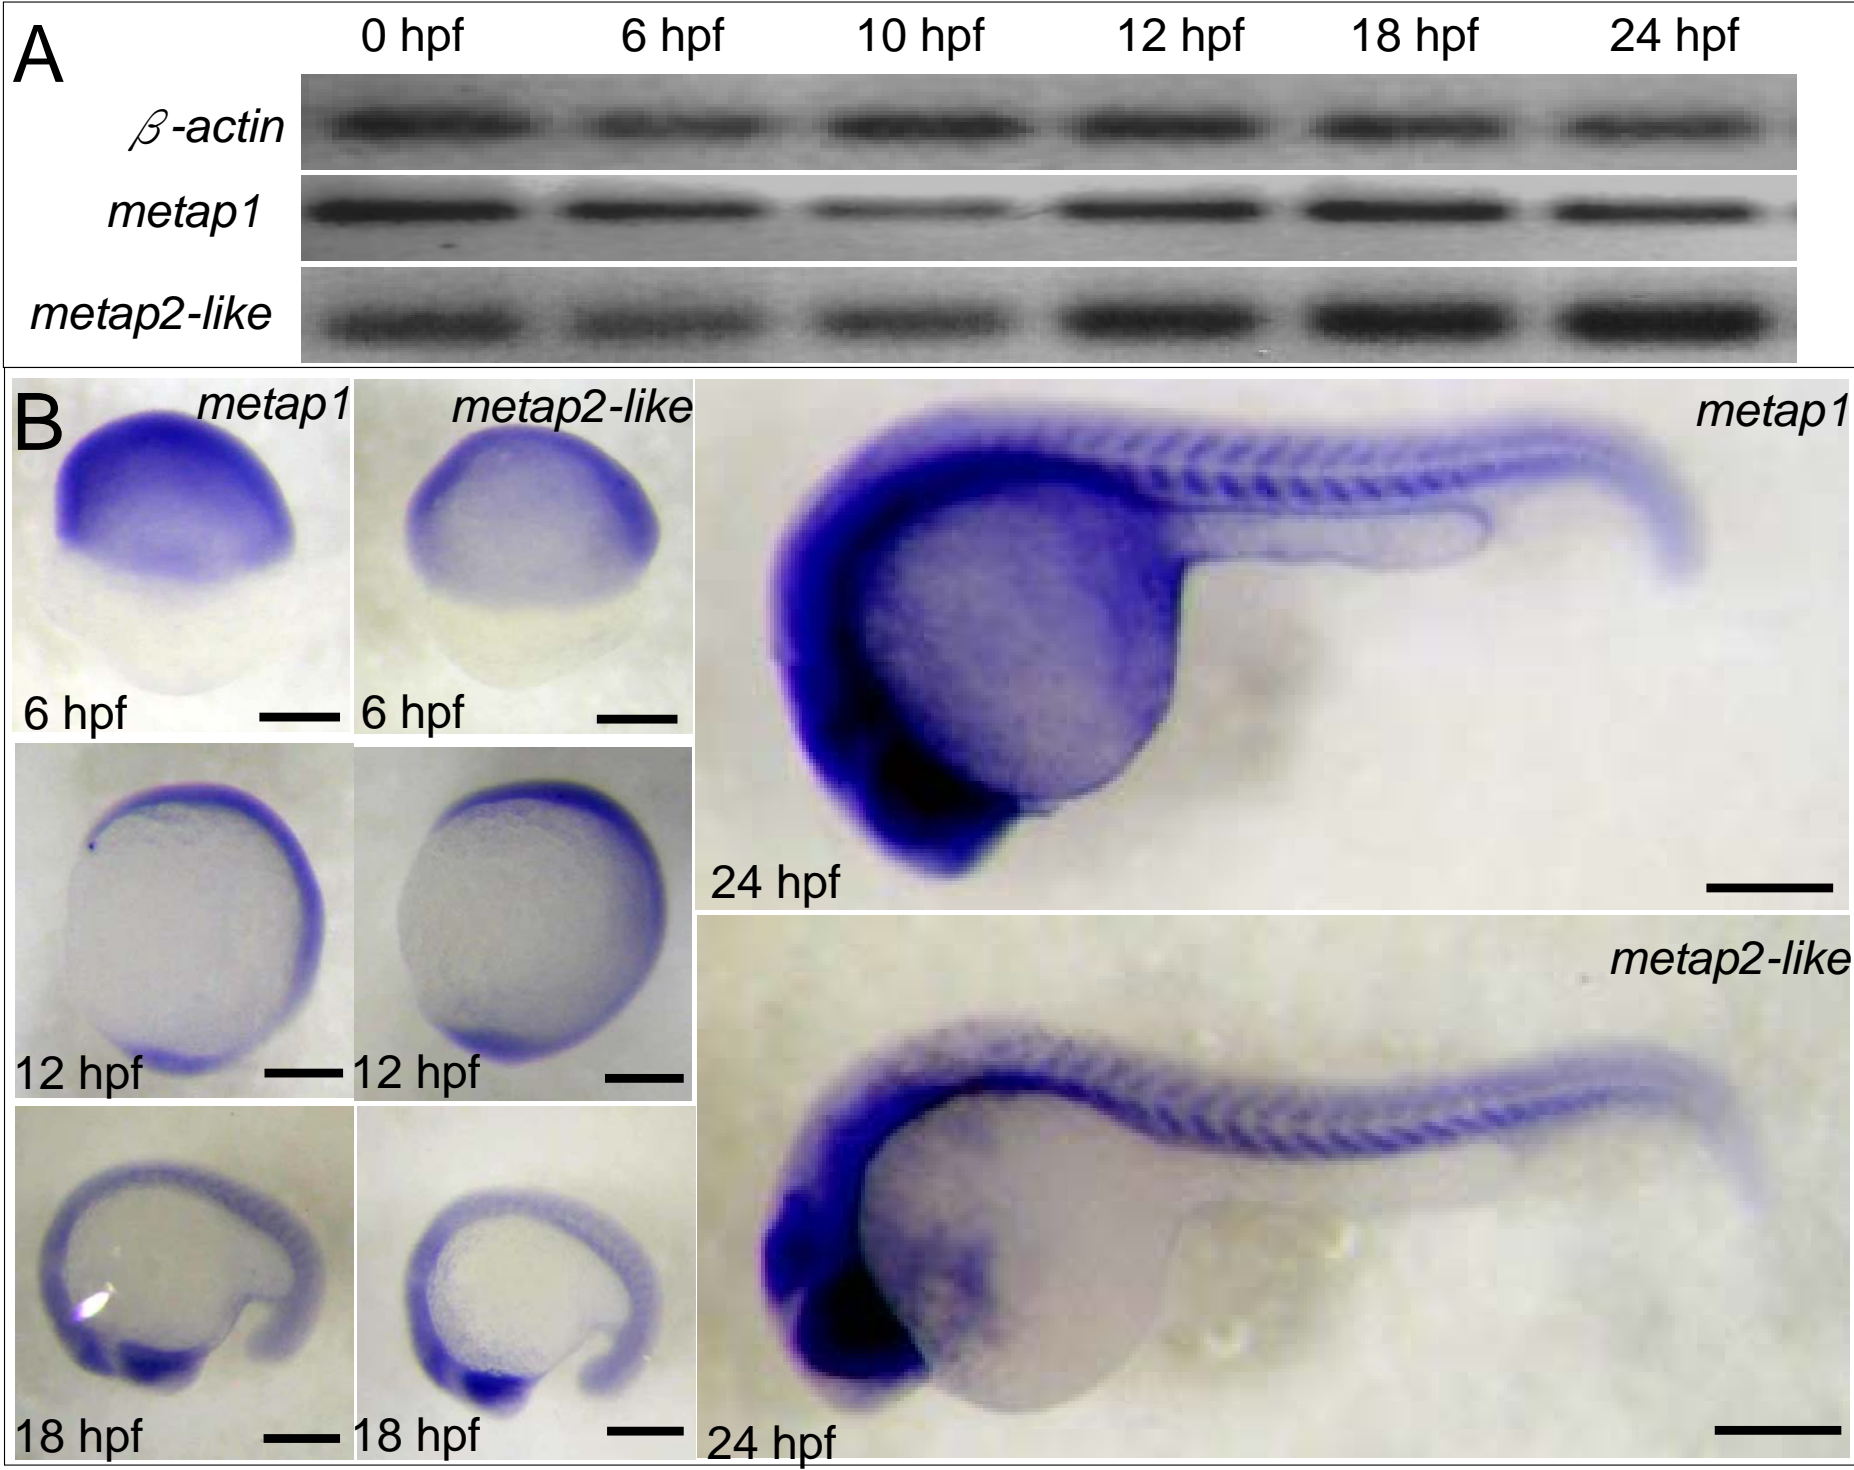



Figure S9

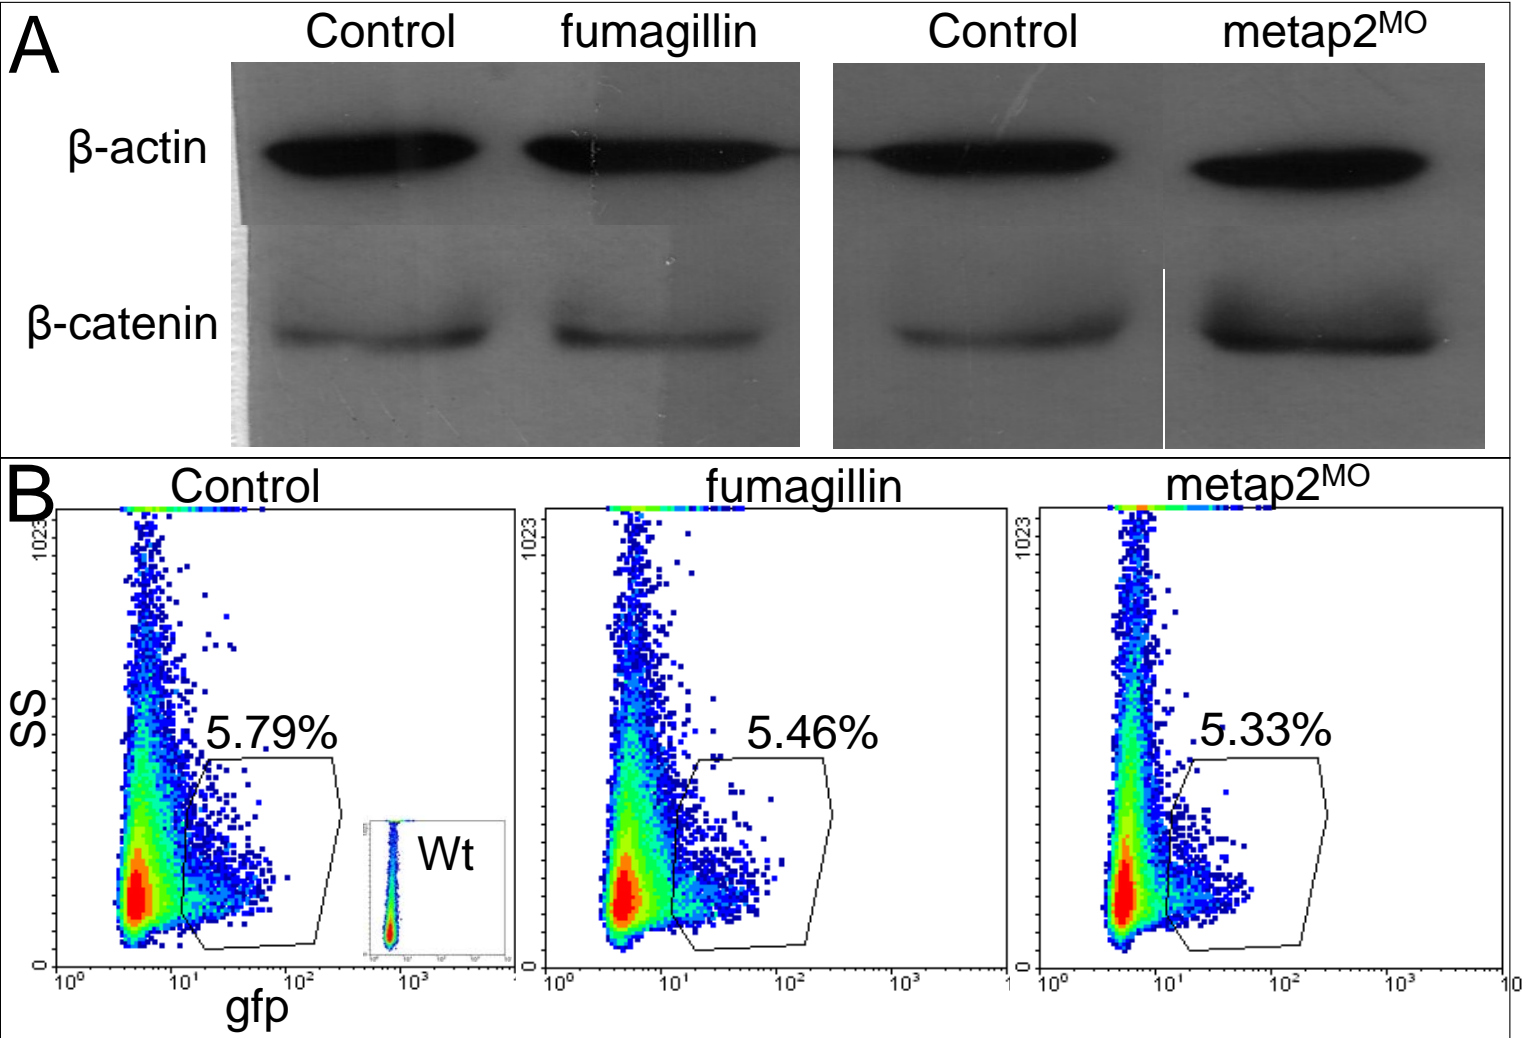

Figure S10

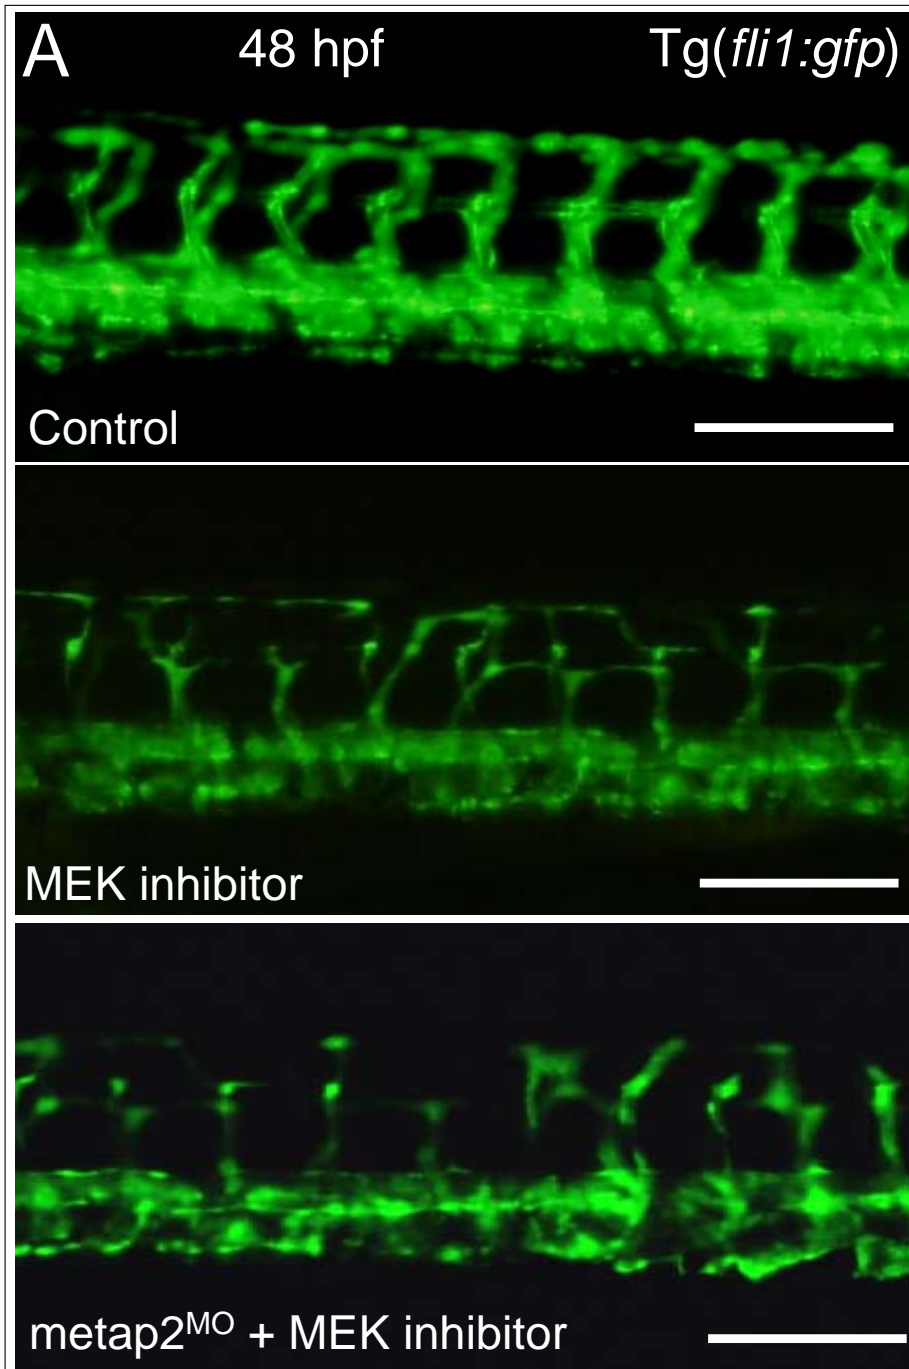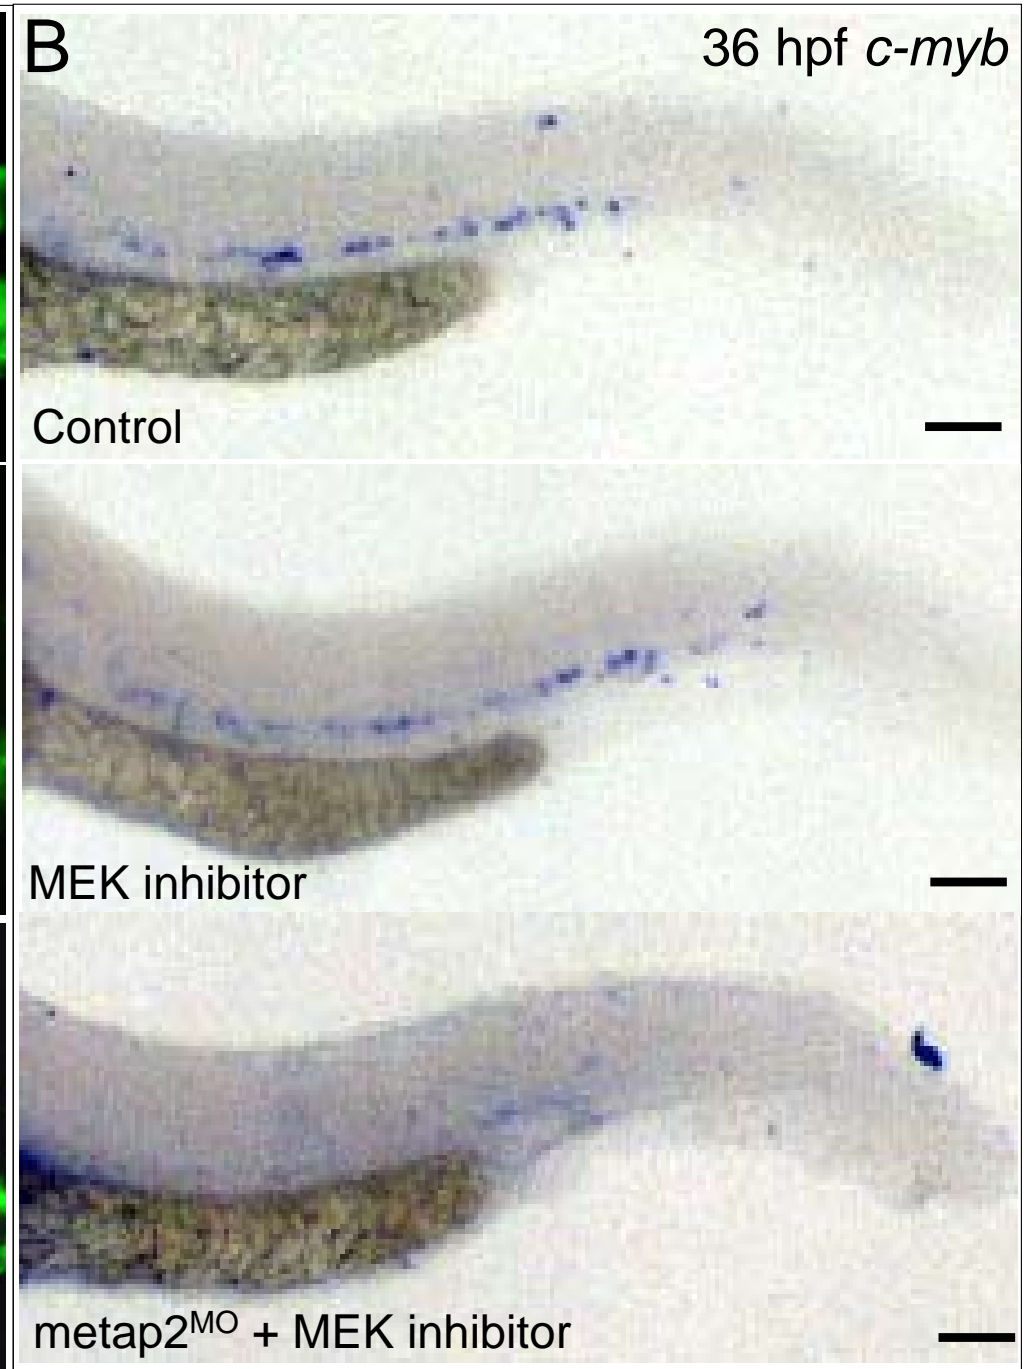



Figure S11

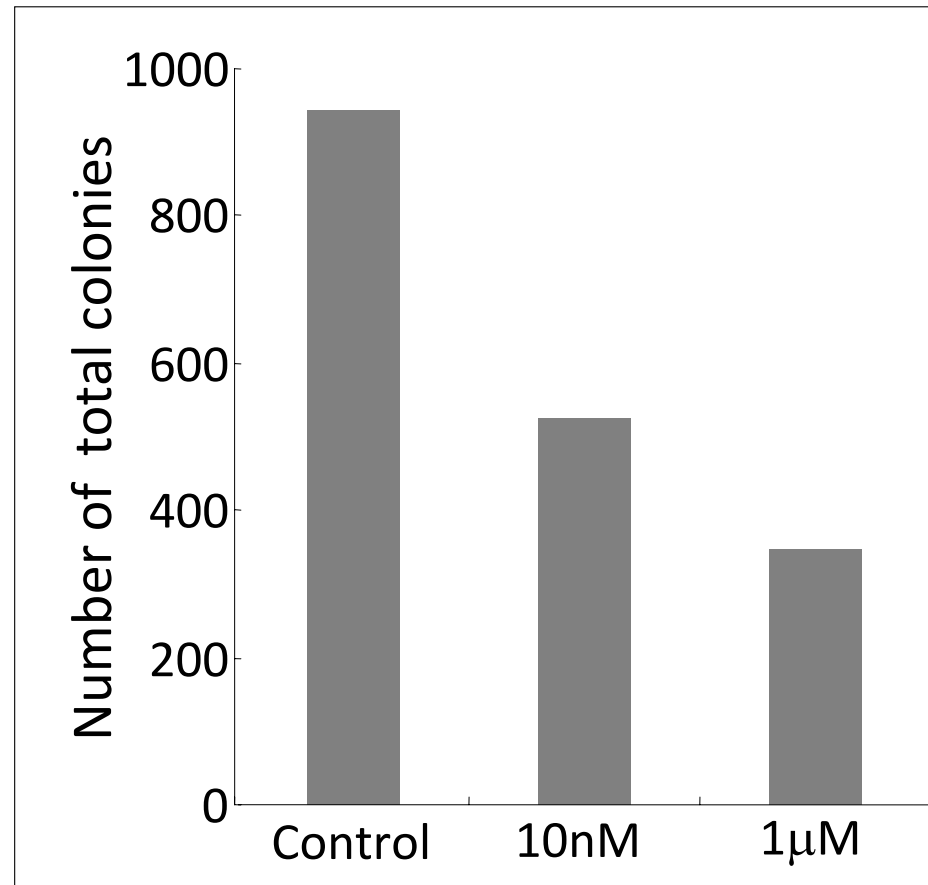

Figure S12

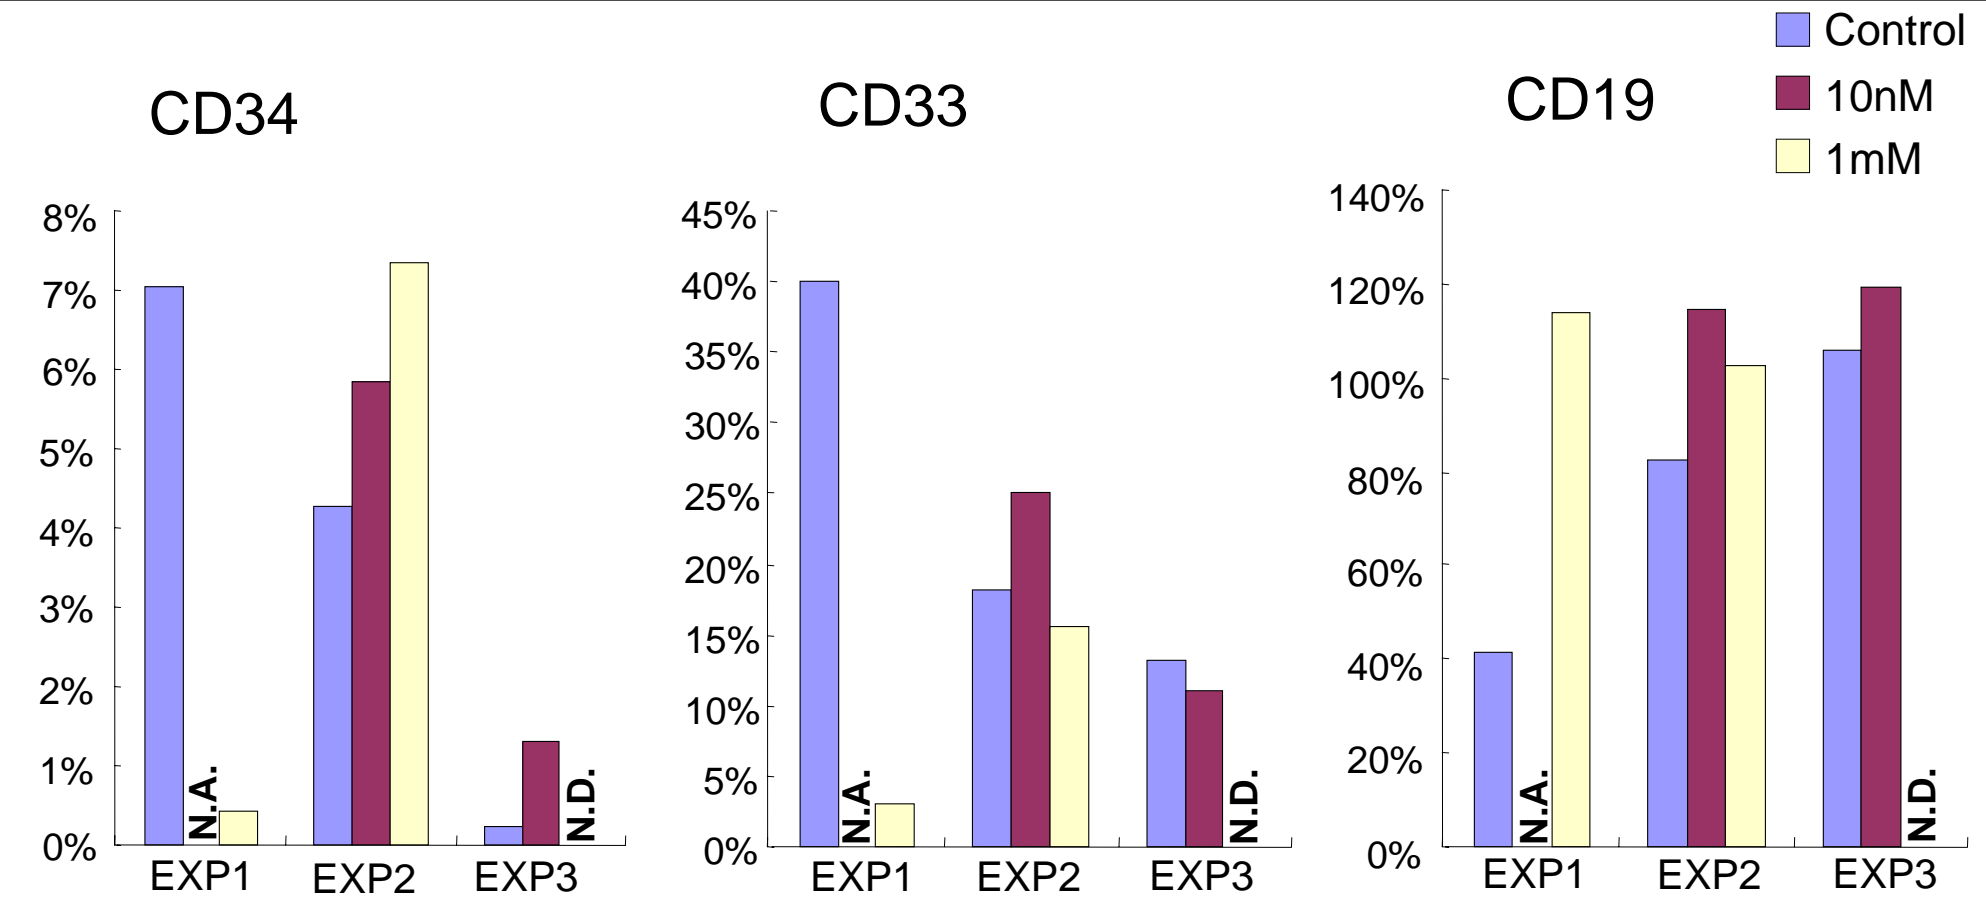

Supplement: supp_blood-2011-04-350173_Document1.pdf [file supp_blood-2011-04-350173_Document1.pdf]
